# Supplementary material
Source: Springer Nature journal article supplement (https://www.springermedizin.de/resource/supplementary/12876_2009_453_MOESM3_ESM.pdf/9437042)
Supplement: MOESM3 [file 9437042]

Table 2. Helicobacter pylori colonization and associated factors.

|                                                       | Number<br>N | HP positive<br>n (%) | Unadjusted OR<br>(95%-CI) | Adjusted <sup>1</sup> OR<br>(95%-CI) |
|-------------------------------------------------------|-------------|----------------------|---------------------------|--------------------------------------|
| <b>Age groups</b>                                     |             |                      |                           |                                      |
| 0-<1 year                                             | 87          | 25 (28.7)            | 1                         | 1                                    |
| 1-<12 years                                           | 340         | 164 (48.2)           | 2.3 (1.4-3.9)*            | 2.4 (1.4-4.1)*                       |
| <b>Sex</b>                                            |             |                      |                           |                                      |
| - Female                                              | 216         | 84 (38.9)            | 1                         | 1                                    |
| - Male                                                | 211         | 105 (49.8)           | 1.6 (1.1-2.3)*            | 1.6 (1.1-2.4)*                       |
| <b>Type of housing</b>                                |             |                      |                           |                                      |
| - Permanent house                                     | 182         | 70 (38.5)            | 1                         | 1                                    |
| - Semi-permanent house                                | 245         | 119 (48.6)           | 1.5 (1.0-2.2) *           | 1.8 (1.2-2.7)*                       |
| <b>Number of people<br/>in same household</b>         |             |                      |                           |                                      |
| - 2-4                                                 | 143         | 55 (38.5)            | 1                         | —                                    |
| ≥5                                                    | 284         | 134 (47.2)           | 1.4 (0.95-2.2)            |                                      |
| <b>Education level of<br/>mother/female caretaker</b> |             |                      |                           |                                      |
| - completed secondary<br>school or higher level       | 84          | 32 (38.1)            | 1                         | —                                    |
| - not completed secondary<br>school                   | 343         | 157 (45.8)           | 1.4 (0.8-2.2)             |                                      |
| <b>Drinking water</b>                                 |             |                      |                           |                                      |
| -Unprotected sources                                  | 43          | 17 (39.5)            | 1                         | —                                    |
| - Public tap                                          | 384         | 172 (44.8)           | 1.24 (0.7-2.4)            |                                      |
| <b>Using pit latrine</b>                              |             |                      |                           |                                      |
| - Yes                                                 | 412         | 182 (44.2)           | 1                         | —                                    |
| - No                                                  | 15          | 7 (46.7)             | 1.1 (0.4-3.1)             |                                      |
| <b>Sharing toilet<br/>with other families</b>         |             |                      |                           |                                      |
| - Yes                                                 | 401         | 170 (42.4)           | 1                         | 1                                    |
| - No                                                  | 26          | 19 (73.1)            | 3.7 (1.5-9.0)*            | 3.7 (1.5-9.3)*                       |
| <b>Wealth index</b>                                   |             |                      |                           |                                      |
| - Poor                                                | 142         | 61 (43.0)            | 1                         | —                                    |
| - Poorer                                              | 142         | 60 (42.0)            | 1.2 (0.8-1.9)             |                                      |
| - Poorest                                             | 143         | 68 (47.9)            | 0.96(0.6-1.5)             |                                      |
| <b>Taken drugs last 3 months</b>                      |             |                      |                           |                                      |
| - Yes                                                 | 345         | 149 (43.2)           | 1                         | —                                    |
| - No                                                  | 82          | 40 (48.8)            | 1.3 (0.8-2.1)             |                                      |
| <b>Taken any antibiotics<br/>last 3 months</b>        |             |                      |                           |                                      |
| - Yes                                                 | 166         | 65 (39.2)            | 1                         | —                                    |
| - No                                                  | 261         | 124 (47.5)           | 1.4 (0.9-2.1)             |                                      |
| <b>Reporting abdominal pain<br/>&gt; 3 times/week</b> |             |                      |                           |                                      |
| - No                                                  | 400         | 176 (44.0)           | 1                         | —                                    |
| -Yes                                                  | 27          | 13 (48.1)            | 1.2 (0.5-2.6)             |                                      |

\* p-value < 0.05  
† adjusted for age, sex, type of housing, number of people in the same household, education level of the mother/female caretaker, if drugs taken the last three months, using a pit, latrine, sharing the toilet with other families, sources of drinking water and wealth index  
N/n number  
OR Odds ratio  
CI Confidence Interval  
HP Helicobacter pylori
